# Supplementary material
Source: publisher figshare collection journal article supplement (https://tandf.figshare.com/articles/dataset/_/6983882)
Supplement: Supplementary file 1 [file 1]

# Detailed Descriptions of the Map Units

Supplement to the **Geologic Map of the Navua Valles region, Mars**

| Symbol | Name              | N       | N(1)<br>10 <sup>-5</sup><br>km <sup>2</sup> | Age assessments (formation and re-surfacing)<br>Default is counting from craters >300 m diameter. "Small craters" are all craters visible on CTX (>15 m)     | Thermal Inertia     | Description                                                      | Interpretation                                                                                                                                                          | Visual example<br>Visible CTX (mosaic) and<br>corresponding THEMIS<br>night IR                                                                                              | Unit Frag-<br>mentation<br>Map Area<br>km <sup>2</sup> , /<br>number of<br>continu-<br>ous map<br>units |
|--------|-------------------|---------|---------------------------------------------|--------------------------------------------------------------------------------------------------------------------------------------------------------------|---------------------|------------------------------------------------------------------|-------------------------------------------------------------------------------------------------------------------------------------------------------------------------|-----------------------------------------------------------------------------------------------------------------------------------------------------------------------------|---------------------------------------------------------------------------------------------------------|
| Nm     | Mountain<br>peaks | 5<br>19 | 5850<br>1110                                | <b>BASEMENT</b><br>4.07 Ga +0.05 -0.09<br>3.81 Ga +0.03 -0.03<br>Noachian 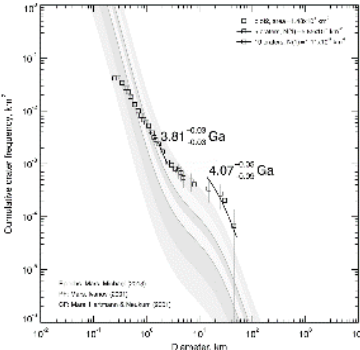 | low to very<br>high | Rounded hills or<br>outcrops of rough<br>bedrock morphol-<br>ogy | Remnant outcrops of<br>the Hellas Basin rim<br>material, or peaks of<br>an uplifted inner ba-<br>sin ring, consisting of<br>upper crust base-<br>ment uplift or ejecta. | <br> | 15078/154                                                                                               |

|             |                               |         |             |                                                                                                                                                                  |     |                                                                                    |                                                        |                                                                                                                                                                            |        |
|-------------|-------------------------------|---------|-------------|------------------------------------------------------------------------------------------------------------------------------------------------------------------|-----|------------------------------------------------------------------------------------|--------------------------------------------------------|----------------------------------------------------------------------------------------------------------------------------------------------------------------------------|--------|
| <b>HNa</b>  | <i>Apron</i>                  | 10<br>8 | 1470<br>559 | <p>3.85 Ga +0.04 -0.06<br/>3.68 Ga +0.04 -0.06<br/>Noachian<br/>Hesperian</p> 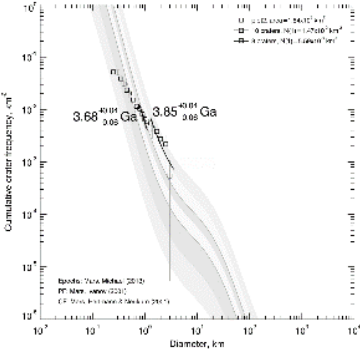  | Low | Thick layer of material surrounding / overlying a Nm ridge, end with steep cliffs. | Megabreccia, sediments and airfall deposits, dissected |      | 1549/1 |
| <b>HNmi</b> | <i>Inter-montan terra, SE</i> | 7<br>28 | 1650<br>211 | <p>3.87 Ga +0.05 -0.08<br/>3.38 Ga +0.07 -0.12<br/>Noachian<br/>Hesperian</p>  |     | See Nmi                                                                            | See Nmi, but with a different modification history     |   | 4718/2 |

|             |                                              |        |            |                                                                                                                                                                                                                    |                     |                                                                                               |                                                                                       |                                                                                      |          |
|-------------|----------------------------------------------|--------|------------|--------------------------------------------------------------------------------------------------------------------------------------------------------------------------------------------------------------------|---------------------|-----------------------------------------------------------------------------------------------|---------------------------------------------------------------------------------------|--------------------------------------------------------------------------------------|----------|
| <b>Nmi</b>  | <i>Inter-montan terra, NW</i>                | 51     | 1120       | <p>3.81 Ga +0.02 -0.03<br/>Noachian</p> 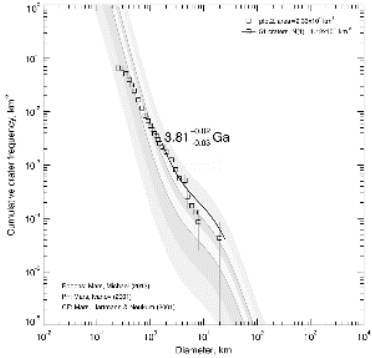                                                                                          | low to moderate-low | Rolling terra surface surrounding Nm units, including layered materials and degraded craters. | Megabreccia, sediments and airfall deposits that buried Nm in the Noachian.           |   | 24494/19 |
| <b>HNms</b> | <i>Sharp-crested mountain (Anseris Mons)</i> | 5<br>7 | 740<br>246 | <p>3.7 Ga +0.1 -0.1<br/>3.5 Ga +0.1 -0.2<br/>Noachian<br/>Hesperian<br/><i>Only steep slopes which may compromise data.</i></p>  | low to very high    | Mountain peak                                                                                 | Impact-derived crustal material. May be Nm modified differently or volcanic material. |  | 1209/1   |

|                    |                                               |           |            |                                                                                                                                                     |                   |                                                                                                                            |                                                                                                                                                              |                                                                                                                                                                               |         |
|--------------------|-----------------------------------------------|-----------|------------|-----------------------------------------------------------------------------------------------------------------------------------------------------|-------------------|----------------------------------------------------------------------------------------------------------------------------|--------------------------------------------------------------------------------------------------------------------------------------------------------------|-------------------------------------------------------------------------------------------------------------------------------------------------------------------------------|---------|
| Hmb                | Rolling or flat plains or hills in the basin  | 5<br>20   | 421<br>228 | <p>3.62 Ga +0.07 -0.16<br/>3.42 Ga +0.07 -0.14<br/>Hesperian</p> 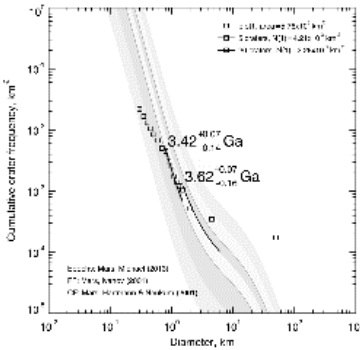  | low to high       | Intermontan and interflow rolling or flat plains on the basin floor, including degraded impact forms.                      | The basin or shelf floor underlying the last flow material emplacements. Impact megabreccia, lacustrine sediments, volcanic deposits, mass wasting materials | <br>    | 5891/14 |
| FLOWS OR SEDIMENTS |                                               |           |            |                                                                                                                                                     |                   |                                                                                                                            |                                                                                                                                                              |                                                                                                                                                                               |         |
| Hpd                | Plains, dissected by a discontinuous drainage | 70<br>333 | 520<br>205 | <p>3.66 Ga +0.02 -0.03<br/>3.36 Ga +0.03 -0.03<br/>Hesperian</p>  | moderate-variable | Plains dissected, wrinkle ridged with degraded / ghost craters, composed of several layers of smooth, horizontal materials | Layers of volcanic flows or airfall deposits                                                                                                                 | <br> | 37600/9 |

|              |                                           |         |           |                                                                  |                                                   |                                                                                              |                                                                             |  |          |
|--------------|-------------------------------------------|---------|-----------|------------------------------------------------------------------|---------------------------------------------------|----------------------------------------------------------------------------------------------|-----------------------------------------------------------------------------|--|----------|
| <b>AHpb</b>  | <i>Plains, IR-bright, in basin</i>        | 146     | 206       | <p>3.36 Ga +0.04 -0.06<br/>Amazonian–Hesperian boundary</p>      | Defined by its high to very high thermal inertia. | Lobate flows of high thermal inertia material in the basin, in many places in small patches. | The most recent episodes of lobate (lava or mud) flow activity in the basin |  | 28402/16 |
| <b>AHpb2</b> | <i>Plain, in the basin, not IR-bright</i> | 3<br>16 | 266<br>63 | <p>3.48 Ga +0.13 -1.10<br/>1.30 Ga +0.29 -0.29<br/>Amazonian</p> | low-moderate                                      | Plains in the basin with not bright IR signature.                                            | Volcanic plains, flow or airfall                                            |  | 1246/1   |

|     |                                     |    |      |                                                                                                                                               |                   |                                                                                                               |                                                                                                                                                 |                                                                                       |         |
|-----|-------------------------------------|----|------|-----------------------------------------------------------------------------------------------------------------------------------------------|-------------------|---------------------------------------------------------------------------------------------------------------|-------------------------------------------------------------------------------------------------------------------------------------------------|---------------------------------------------------------------------------------------|---------|
| AHp | Plains                              | 62 | 199  | <p>3.34 Ga +0.07 -0.11<br/>Amazonian–Hesperian boundary</p> 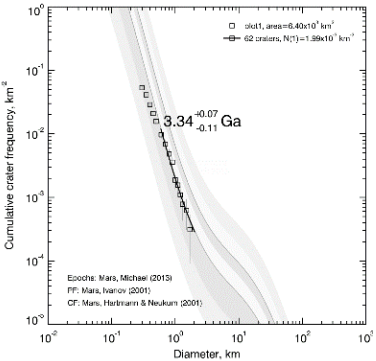 | moderate-variable | Wrinkle ridged<br>smooth plains.                                                                              | The latest Hesperian volcanic lava fields, probably directly originates from Hadriacus Mons. Flow and/or volcaniclastic airfall. Lava channels. |    | 6615/1  |
|     |                                     |    |      | <b>FILLS</b> All ages are combined of all individual occurrences.                                                                             |                   |                                                                                                               |                                                                                                                                                 |                                                                                       |         |
| f   | Fill                                | 8  | 1770 | <p>3.9 Ga +0.1 -0.1<br/>Amazonian to Hesperian</p>                                                                                            |                   | Smooth, flat,<br>densely cratered<br>fill commonly in<br>craters, large sec-<br>ondaries or de-<br>pressions. | Airfall debris and/or<br>flows and/or lacus-<br>trine sediments                                                                                 |   | 4369/44 |
| fc  | Complex<br>crater or<br>valley fill |    |      | N/A                                                                                                                                           |                   | Complex (rum-<br>pled, lineated,<br>ridged) material<br>within craters                                        | Recent glacial mate-<br>rial deformed by sub-<br>limation, collapse                                                                             |  | 567/39  |



|           |                                               |         |           |                                                                              |  |                                                                                                             |                                                           |                                                                                      |         |
|-----------|-----------------------------------------------|---------|-----------|------------------------------------------------------------------------------|--|-------------------------------------------------------------------------------------------------------------|-----------------------------------------------------------|--------------------------------------------------------------------------------------|---------|
| <b>fl</b> | <i>Complex lineated crater or valley fill</i> | 6       | 20        | 0.43 Ga +0.1 -0.2                                                            |  | Lineated material within craters, channels and valleys                                                      | Recent glacial material lineated by creep                 |   | 430/29  |
| <b>b</b>  | <i>Intra-crater bajada</i>                    | 22<br>1 | 28<br>1.9 | Large craters:<br>0.59 Ga +0.1 -0.1<br>Small craters:<br>0.04 Ga +0.04 -0.04 |  | Merged fan shaped deposits on crater interior slopes                                                        | Dry mass wasting materials                                |   | 1717/10 |
| <b>db</b> | <i>Valley-blocking fill deposit</i>           | 2       | 5.8       | 0.12 Ga +0.08 -0.08                                                          |  | Material that is collected in channels and valleys, with smooth or patterned/cracked surface                | Glacier, rock glacier, ice-rich material or indurated mud |  | 18/6    |
|           |                                               |         |           | <b>IMPACT MATERIALS</b>                                                      |  |                                                                                                             |                                                           |                                                                                      |         |
| <b>c</b>  | <i>Impact craters</i>                         |         |           | N/A                                                                          |  | Undifferentiated, impact crater materials, not exhibiting grooves, rampart, lobate or pedestal morphologies | Dry ejecta or degraded impact material.                   |                                                                                      | 599/8   |

|    |                                        |           |           |                                                                             |  |                                                                                                                                                                                        |                                |                                                                                       |         |
|----|----------------------------------------|-----------|-----------|-----------------------------------------------------------------------------|--|----------------------------------------------------------------------------------------------------------------------------------------------------------------------------------------|--------------------------------|---------------------------------------------------------------------------------------|---------|
| cg | <i>Grooved ejecta crater material</i>  | 14<br>147 | 816<br>62 | 3.8 Ga +0.0 -0.1<br>1.3 Ga +0.1 -0.1<br>Noachian to Amazonian, combined age |  | Radially lineated crater ejecta. The ejecta's primary characteristic is the grooves but it may be accompanied with secondary, different degrees of pedestal and lobate characteristics | Fluidized impact crater ejecta | 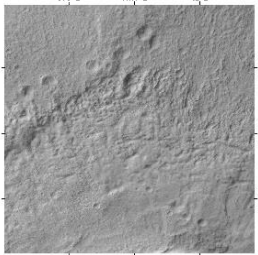   |         |
| cr | <i>Rampart ejecta crater material</i>  | 4         | 381       | 3.6 Ga +0.1 -0.3<br>After the Hesperian, combined age                       |  | Rampart crater ejecta. Likely similar to lobate ejecta, but fresher. Degraded lobate ejecta craters may also have remnant rampart.                                                     | Fluidized impact crater ejecta |    | 1907/1  |
| cl | <i>Lobate ejecta crater material</i>   | 45        | 402       | 3.6 Ga +0.0 -0.0<br>Noachian to Amazonian, combined age                     |  | Primarily characteristic is well developed lobes often with grooves but no rampart.                                                                                                    | Fluidized impact crater ejecta |   | 8459/23 |
| cp | <i>Pedestal ejecta crater material</i> | 7         | 320       | 3.5 Ga +0.1 -0.2<br>Since the Hesperian, Combined age                       |  | Quasi-circular crater ejecta with steep terminus, not lobate. Often grooved, may be lobate. Often with disintegrating - knobby - edge and interior                                     | Fluidized impact crater ejecta |  | 2811/33 |
|    |                                        |           |           | <b>LAYERED MATERIALS</b>                                                    |  |                                                                                                                                                                                        |                                |                                                                                       |         |



|     |                                          |                |                 |                                                                                                                              |     |                                                                                           |                                                                                                                                                                                                       |                                                                                      |          |
|-----|------------------------------------------|----------------|-----------------|------------------------------------------------------------------------------------------------------------------------------|-----|-------------------------------------------------------------------------------------------|-------------------------------------------------------------------------------------------------------------------------------------------------------------------------------------------------------|--------------------------------------------------------------------------------------|----------|
|     |                                          |                |                 | Age reflects a combination of formation, exhumation, surface exposure times                                                  |     |                                                                                           |                                                                                                                                                                                                       |                                                                                      |          |
| e   | Erosional windows / Etched terrain       | 13<br>30       | 512<br>136      | 3.7 Ga +0.0 -0.1<br>2.8 Ga +0.3 -0.4<br>Hesperian to Amazonian                                                               | low | Light toned, typically layered material outcrops and cliffs in depressions. ways layered. | Eroded and exhumed layered deposit, inliers.                                                                                                                                                          | 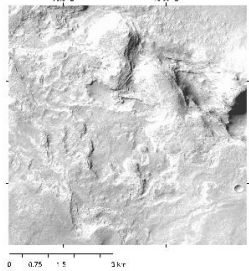  | 4442/41  |
| Hml | Layered mountains and hills in the basin | 21             | 287             | 3.51 Ga +0.06 -0.10<br>                     | low | Mountaneous to rolling regions between flat plains exhibiting stepped slopes.             | Outliers or inliers, eroded layered basin deposits formed by horizontal sedimentation. Outcrops differentially eroded or blanket showing solifluction terraces. May be similar to the layers of "e" . |  | 4466/21  |
|     |                                          |                |                 | <b>CHANNEL MATERIALS</b>                                                                                                     |     |                                                                                           |                                                                                                                                                                                                       |                                                                                      |          |
| cm  | Channel-related materials                | 4<br>82<br>135 | 255<br>45<br>50 | Combined age (large craters):<br>3.5 Ga +0.1 -0.8<br>0.93 Ga +0.09 -0.09<br>Combined age (small craters)<br>1.0 Ga +0.1 -0.1 |     | Channel, and channel belt materials, terminal and overbank deposits                       | Fluvial deposits                                                                                                                                                                                      |                                                                                      | 4920/152 |
|     |                                          |                |                 | <b>DATED INDIVIDUAL FEATURES</b>                                                                                             |     |                                                                                           |                                                                                                                                                                                                       |                                                                                      |          |

| CHAN-<br>NELS<br>SYS-<br>TEMS |  |                                   |                                       | Combined ages of all channel reaches and deposits likely reflect different evolutions of different reaches. Measurements on small craters.                                                                                                     | Stratigraphy                                                                                                                |  |  | map of the craters counted                                                           |     |
|-------------------------------|--|-----------------------------------|---------------------------------------|------------------------------------------------------------------------------------------------------------------------------------------------------------------------------------------------------------------------------------------------|-----------------------------------------------------------------------------------------------------------------------------|--|--|--------------------------------------------------------------------------------------|-----|
| Navua<br>A*                   |  | 7<br>20                           | 106<br>32                             | 2.2 Ga +0.8 -0.8<br>0.67 Ga +0.1 -0.1<br>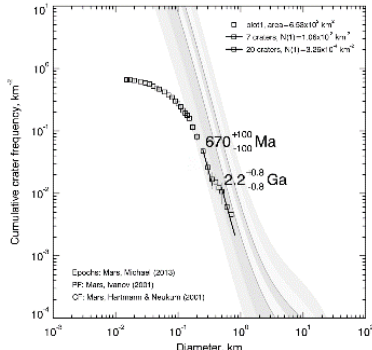                                                                                                                     | Younger than<br>Hpd, AHpb,<br>Hcl35 because<br>it cuts into<br>them. Valleys<br>filled with ma-<br>terial from<br>Acl336    |  |  |   | 653 |
| Navua<br>B*                   |  | 2<br>3<br>11<br>84<br><br>5<br>13 | 352<br>79<br>12<br>2<br><br>35<br>2.8 | 3.6 Ga +0.1-1.0 (background)<br>1.6 Ga +0.7 -0.7<br>0.25 Ga +0.04 -0.04<br>0.04 Ga +0.003 -0.003<br>Confluence:<br>0.73 +0.3 -0.3<br>0.057 +0.009 -0.009<br> | Younger than<br>AHpb because<br>it deflects,<br>younger than<br>HclM because<br>it cuts into it.<br>Overlain by<br>Acg2204. |  |  |  | 498 |

|                             |                                                          |    |     |                                      |                                                           |  |  |                                                                                   |         |
|-----------------------------|----------------------------------------------------------|----|-----|--------------------------------------|-----------------------------------------------------------|--|--|-----------------------------------------------------------------------------------|---------|
| <b>Navua<br/>C* (All)</b>   |                                                          | 10 | 62  | 1.3 Ga +0.4 -0.4                     | Cuts into Hmib                                            |  |  | 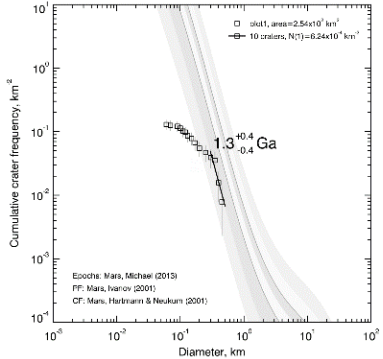 | 254     |
| <b>Channel<br/>D* (All)</b> |                                                          | 10 | 52  | 1.1 Ga +0.3 -0.33                    | Cuts into AHpb,<br>Hml, Hmib,<br>AcrP                     |  |  |  | 568     |
|                             | <i>Robbins<br/>crater<br/>catalog<br/>ID or<br/>name</i> |    |     | <b>IMPACT CRATER EJECTA BLANKETS</b> | <i>Terrain type<br/>(terra [high-<br/>land] or basin)</i> |  |  |                                                                                   |         |
| <b>HNcl431</b>              | 28-431                                                   | 6  | 889 | 3.8 Ga +0.1 -0.1                     | T                                                         |  |  |                                                                                   | 4301    |
|                             |                                                          | 29 | 317 | 3.5 Ga +0.0 -0.1                     |                                                           |  |  |                                                                                   |         |
| <b>Ncl126</b>               | 21-126                                                   | 19 | 621 | 3.7 Ga +0.1 -0.1                     | T                                                         |  |  |                                                                                   | 3646    |
| <b>Hcl724</b>               | 28-724                                                   | 6  | 679 | 3.7 Ga +0.1 -0.1                     | T                                                         |  |  |                                                                                   | 871     |
| <b>Hcl346</b>               | 28-346                                                   | 11 | 526 | 3.7 Ga +0.1 -0.1                     | B                                                         |  |  |                                                                                   | 3674    |
| <b>HclM</b>                 | Majuro                                                   | 12 | 387 | 3.6 Ga +0.1 -0.1                     | T                                                         |  |  |                                                                                   | 10059/8 |
| <b>Hcl35</b>                | 28-35                                                    | 69 | 348 | 3.6 Ga +0.0 -0.0                     | T                                                         |  |  |                                                                                   | 17955   |
| <b>AcrP</b>                 | Poti                                                     | 30 | 197 | 3.29 Ga +0.08 -0.13                  | B                                                         |  |  |                                                                                   | 7585    |

|                         |                 |         |           |                                         |   |                                                      |  |      |
|-------------------------|-----------------|---------|-----------|-----------------------------------------|---|------------------------------------------------------|--|------|
| <b>Acl336</b>           | 28-336          | 28      | 128       | 2.6 Ga +0.4 -0.4                        | T |                                                      |  | 8213 |
| <b>Acp1579</b>          | 28-1579         | 20      | 121       | 2.5 Ga +0.5 -0.5                        | B |                                                      |  | 219  |
| <b>Acg1089</b>          | 28-1089         | 12      | 43        | 0.89 Ga +0.3 -0.3                       | B |                                                      |  | 746  |
| <b>Acl475</b>           | 28-475          | 8       | 40        | 0.83 Ga +0.3 -0.3                       | B |                                                      |  | 1890 |
| <b>Acg2204</b>          | 28-2204         | 9       | 8.8       | 0.18Ga +0.06 -0.06                      | T |                                                      |  | 51   |
| <b>CRATER<br/>FILLS</b> |                 |         |           |                                         |   |                                                      |  |      |
| <b>Nf126</b>            | 21-126          | 7       | 1110      | 3.8 Ga +0.1 -0.1                        | T |                                                      |  | 694  |
| <b>HfM</b>              | Majuro<br>South | 2       | 270       | 3.5 Ga +0.1 -2.0                        | T |                                                      |  | 291  |
| <b>Af35</b>             | 21-35           | 5<br>48 | 122<br>22 | 2.5 Ga +0.7 -1.0<br>0.45 Ga +0.06 -0.06 | T |                                                      |  | 1763 |
| <b>AbM</b>              | Majuro<br>North | 3       | 3.6       | 0.075 Ga +0.04 -0.04                    | T |                                                      |  | 267  |
| <b>Af76</b>             | 28-76           | 15      | 188       | 3.30 Ga +0.13 -0.45                     | B | Crater fill exhibit-<br>ing dense field of<br>mounds |  | 1520 |

**Supporting Table 1. Characteristics, ages, crater size frequency diagrams and type examples of the geologic units.**

| Unit    | No (ID) | Area km <sup>2</sup> | N  | N(1) 10 <sup>-5</sup> km <sup>2</sup> | Formation (Ga) | Error + | Error - | Nresurf | N(1) resurf<br>10 <sup>-5</sup> km <sup>2</sup> | Resurfacing<br>age Ga | Error + | Error - |
|---------|---------|----------------------|----|---------------------------------------|----------------|---------|---------|---------|-------------------------------------------------|-----------------------|---------|---------|
| 3A--    | 3       | 63                   | 10 | 7.48                                  | 0.153          | 0.42    | 0.42    |         |                                                 |                       |         |         |
| 4A-     | 4       | 35                   | 8  | 6.6                                   | 0.135          | 0.47    | 0.47    |         |                                                 |                       |         |         |
| 5A-     | 5       | 93                   | 31 | 42                                    | 0.866          | 0.15    | 0.15    |         |                                                 |                       |         |         |
| 6A-     | 6       | 121                  | 4  | 285                                   | 3.5            | 0.11    | 0.59    | 15      | 23.6                                            | 0.485                 | 0.094   | 0.094   |
| 7A-     | 7       | 60                   | 2  | 95.8                                  | 1.96           | 1.2     | 1.4     | 16      | 10.8                                            | 0.222                 | 0.048   | 0.048   |
| 8Ar     | 8       | 43                   | 5  | 18.9                                  | 0.387          | 0.16    | 0.16    |         |                                                 |                       |         |         |
| 9Ar     | 9       | 116                  | 3  | 65                                    | 1.33           | 0.76    | 0.76    | 20      | 11                                              | 0.235                 | 0.041   | 0.041   |
| 10A+    | 10      | 127                  | 2  | 80                                    | 1.64           | 0.94    | 0.94    | 12      | 2.5                                             | 0.052                 | 0.013   | 0.013   |
| 11A++   | 11      | 619                  | 13 | 262                                   | 3.48           | 0.11    | 0.53    | 18      | 53                                              | 1.1                   | 0.18    | 0.18    |
| 12A++   | 12      | 138                  | 2  | 239                                   | 3.44           | 0.17    | 2       | 4       | 27                                              | 0.551                 | 0.22    | 0.22    |
| 13G++   | 13      | 93                   | 25 | 23                                    | 0.469          | 0.089   | 0.089   |         |                                                 |                       |         |         |
| 14E++   | 14      | 182                  | 12 | 24.5                                  | 0.503          | 0.14    | 0.14    |         |                                                 |                       |         |         |
| 16B--   | 16      | 152                  | 19 | 16                                    | 0.331          | 0.072   | 0.072   |         |                                                 |                       |         |         |
| 18B+r   | 18      | 165                  | 2  | 107                                   | 2.2            | 1.1     | 1.5     | 8       | 18                                              | 0.374                 | 0.12    | 0.12    |
| 19B+l   | 19      | 122                  | 4  | 48                                    | 1              | 0.44    | 0.44    | 12      | 11                                              | 0.226                 | 0.053   | 0.053   |
| 18-19B+ | 18-19   | 215                  | 2  | 814                                   | 3.75           | 0.09    | 0.31    | 1       | 71                                              | 1.47                  | 0.73    | 0.73    |
| 20B+    | 20      |                      | 3  | 6.2                                   | 0.12           | 0.073   | 0.073   |         |                                                 |                       |         |         |
| 21B+tr  | 21      | 118                  | 4  | 51                                    | 1.04           | 0.52    | 0.52    | 27      | 8.8                                             | 0.181                 | 0.032   | 0.032   |
| 22B++   | 22      | 221                  | 21 | 69                                    | 1.42           | 0.31    | 0.31    |         |                                                 |                       |         |         |
| 23B++   | 23      | 207                  | 5  | 67                                    | 1.38           | 0.61    | 0.61    | 14      | 2.3                                             | 0.047                 | 0.008   | 0.008   |
| 24B++ss | 24      | 106                  | 5  | 179                                   | 3.26           | 0.21    | 1.2     |         |                                                 |                       |         |         |
| 31C     | 31      | 242                  | 5  | 50                                    | 1.0            | 0.4     | 0.4     |         |                                                 |                       |         |         |
| 25D-    | 25      | 332                  | 2  | 64                                    | 1.31           | 0.92    | 0.92    | 6       | 16                                              | 0.339                 | 0.11    | 0.11    |
| 26D+    | 26      | 968                  | 6  | 50                                    | 1.03           | 0.39    | 0.39    |         |                                                 |                       |         |         |

**Supporting Table 2. Channel sequence channel floor model ages** (numbers refer to sequences and deposits marked in FIG. 1). Some sequences were not datable. Unit IDs are composites of site ID (number), drainage system designation (A-G) and Approximate position of site within a system (-- upper, -, middle, + lower middle, ++ lower reaches). r=right branch, l=left branch, s=southern. All ages are in Ga.

Crater size frequency diagrams of the channel sections (see Fig. 1 for locations of deposit sites)

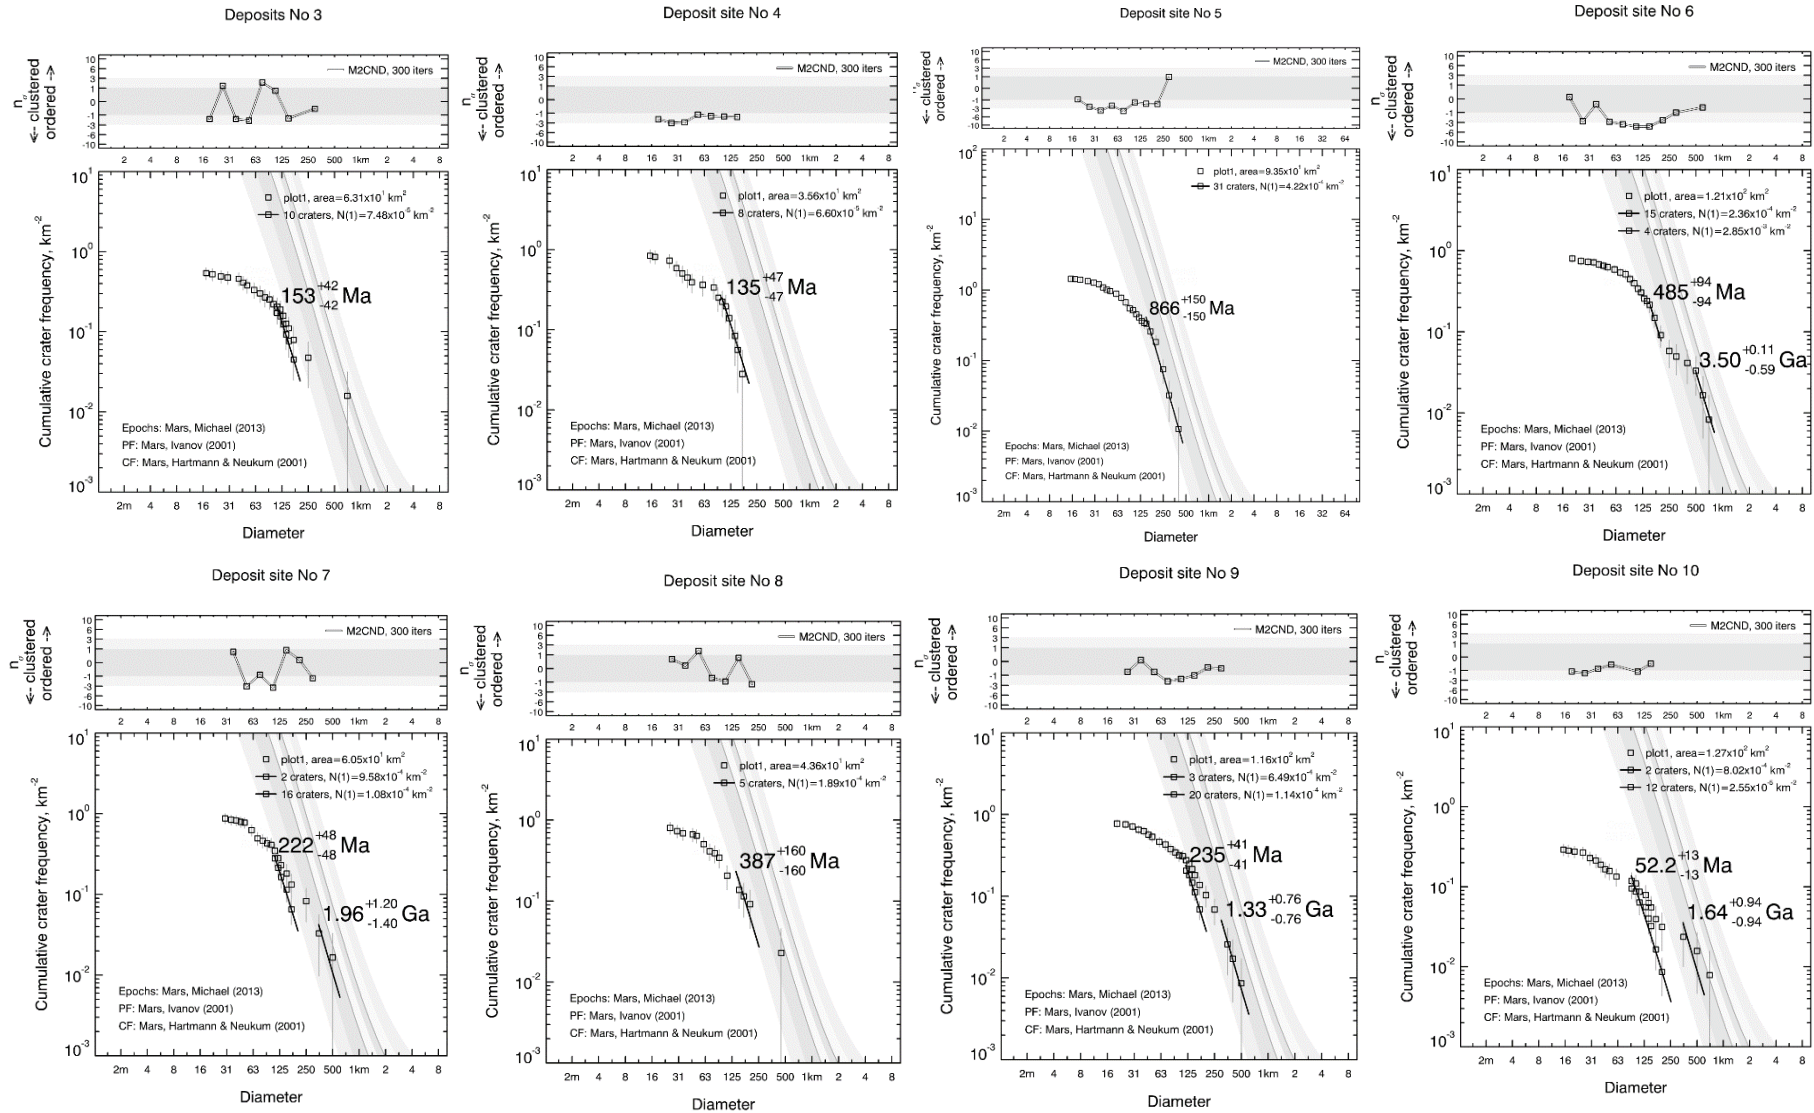



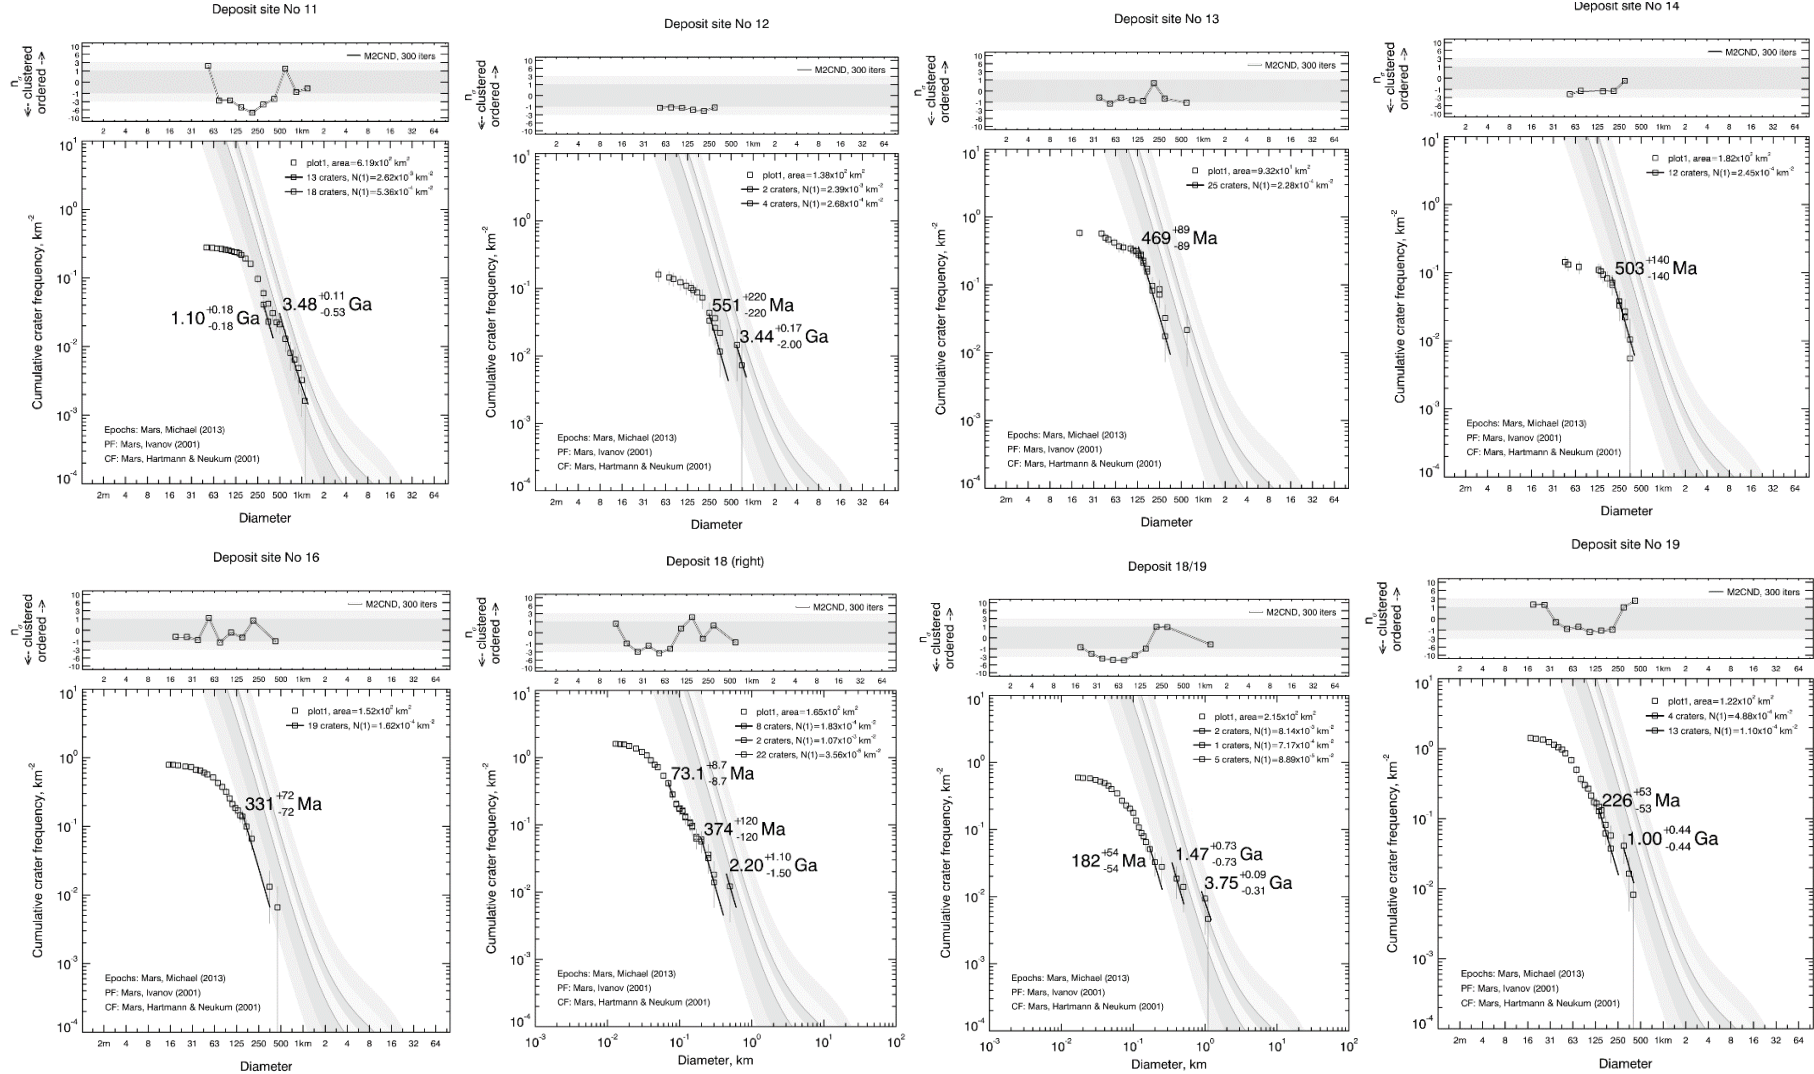

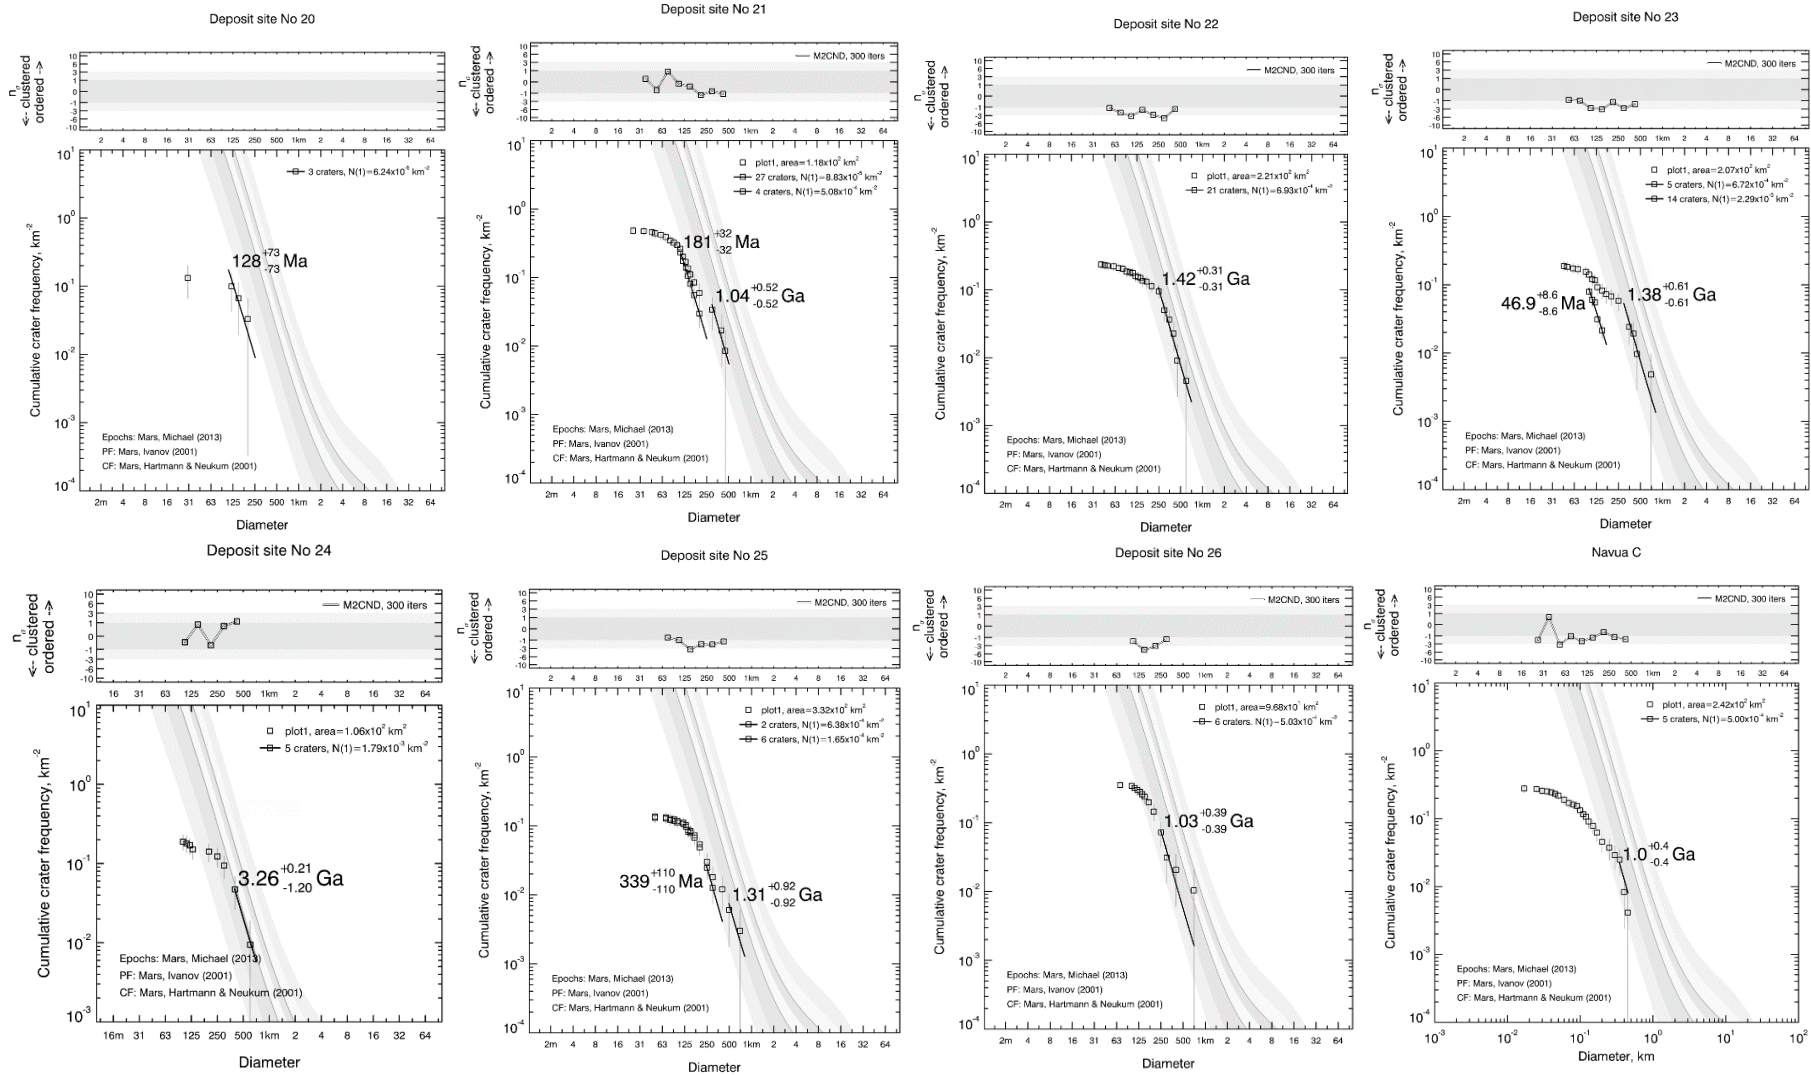

Supporting table 2 – contd. Crater size frequency diagrams of the channel sections.
